# Supplementary material for: Screening Biomarkers for Systemic Lupus Erythematosus Based on Machine Learning and Exploring Their Expression Correlations With the Ratios of Various Immune Cells
Source: Front Immunol. 2022 Jun 10;13:873787. doi: 10.3389/fimmu.2022.873787 (PMC9226453; doi:10.3389/fimmu.2022.873787)
Supplement: Supplementary file 1 [file Table_1.xlsx]

## Sheet: Description
Sheet	Description
A-14 Candidate biomarkers	14 candidate biomarkers
B-qPCR raw data	The qPCR Ct values of 13 SLE samples and 10 control samples

## Sheet: A-14 Candidate biomarkers
Gene
IFI27
PLSCR1
EIF2AK2
HERC6
ID3
ABCB1
C19orf66
PCYOX1
HSP90AB1
SRBD1
SCRN1
CD74
GPR160
CD160

## Sheet: B-qPCR raw data
	ABCB1	EIF2AK2	HERC6	ID3	IFI27	PLSCR1	GADPH
patient 1	28.49	26.4	23.16	31.96	29.69	22.54	16
	29.64	27.84	24.25	29.11	31.65	23.18	17.17
	28.82	26.51	25.22	28.66	31.9	23.9	16.27
patient 2	27.72	25.22	23	32.29	25.34	21.84	15.82
	28.17	25.32	23.07	32.08	26.12	21.86	15.99
	28.03	24.61	23.09	38.57	24.29	21.42	15.91
patient 3	29.1	23.32	21.97	33.18	26.59	21.29	13.41
	29.41	23.42	22.65	31.9	25.82	21.04	13.27
	29.35	23.58	22.35	33.01	24.19	21.43	13.19
patient 4	28.22	24.08	21.94	31.7	29.87	21.78	15.36
	28.3	23.64	22.28	31.78	25.96	21.71	14.33
	28.52	23.58	22.03	31.06	26.65	21.76	14.42
patient 5	30.4	28.7	27.94	33.1	27.44	25.29	16.39
	31.45	28.61	27.7	31.59	27.4	25.21	16.48
	30.96	28.75	27.55	34.1	27.86	26.23	16.75
patient 6	26.4	22.24	21.44	37.52	22.15	20.83	13.26
	26.28	22.47	21.65	37.41	22.38	20.64	13.04
	26.51	22.37	21.41	35.12	22.43	21.12	13.27
patient 7	27	21.84	21.02	39.14	20.81	20.43	11.8
	26.15	22.03	21.17	37.22	20.83	20.86	13.89
	26.74	22.58	22.27	36.77	21.81	21.68	14.62
patient 8	26.84	26.01	24.23	35.23	24.89	22.93	14.95
	26.85	25.43	24.71	33.47	24.95	22.89	14.92
	27.11	25.29	24.54	34.03	24.83	22.77	15.01
patient 9	26.45	23.68	21.26	29.52	23.43	22.61	13.89
	26.51	23.37	21.04	30.58	22.9	21.87	14.05
	26.26	23.7	21.18	29.98	23.11	22.81	14.16
patient 10	26.79	24	21.91	31.37	20.81	22.19	13
	26.95	23.97	22.23	33.47	21.29	22.58	13.88
	26.77	24.13	22.21	31.27	21.2	22.34	12.22
patient 11	27.01	25.78	22.78	32.24	24.69	25.29	15.13
	26.8	25.61	23.31	32.65	24.55	25.22	15.04
	26.92	25.48	22.81	34.22	24.77	25	15.15
patient 12	27.61	23.59	21.21	31.85	20.31	22.37	14.32
	26.59	23.51	21.39	32.18	20.73	22.23	14.34
	27.43	23.77	21.18	32.87	20.25	22.22	14.45
patient 13	27.02	23.8	23.53	33.53	23.08	24.19	15.85
	26.98	23.68	23.21	34.16	23.4	23.9	16.03
	27.17	25.09	24.85	32.49	23.59	24.73	16
control 1	25.24	25.51	23.4	34.28	27.3	22.22	14.36
	25.77	25.54	23.57	33.13	27.76	22.43	14.66
	25.45	26.08	23.8	33.03	27.62	23.2	14.45
control 2	24.55	25.81	23.68	34.04	28.02	22.81	14.25
	24.52	25.99	24.23	34.57	27.63	22.79	14.2
	24.64	25.57	23.67	36.07	27.46	23.03	14.18
control 3	25.36	25.96	24.28	34.2	27.48	23.1	14.34
	25.6	25.52	24.03	34.28	27.2	22.88	14.58
	25.32	25.4	23.75	34.4	27.76	22.93	14.75
control 4	24.33	26.84	24.06	34.3	29.1	24.37	14.99
	24.23	26.82	24.55	36.12	29.88	24.35	14.71
	24.37	26.58	24.32	36.15	30.05	24.27	14.84
control 5	26.92	26.06	23.02	30.84	28.2	23.51	14.79
	27.19	25.95	23.09	31.47	28.25	23.12	14.49
	27.68	26.13	22.76	32.39	28.2	23.23	14.4
control 6	25.44	26.33	22.29	33.14	30.21	24.08	14.44
	25.08	26.03	22.65	29.85	30.09	24.11	14.54
	25.52	24.58	22.24	30.97	31.63	24.28	14.52
control 7	26.65	25.8	22.13	31.18	29.41	24.09	14.17
	25.98	25.87	22.81	31.53	29.33	24.24	14.86
	26.8	25.88	22.58	33.45	28.98	24.27	14.5
control 8	25.93	25.87	22.75	30.92	30.67	24.52	15.49
	25.83	26	22.92	35.49	30.28	23.83	15.12
	24.65	25.64	22.34	29.86	30.85	24.06	14.75
control 9	26	22.88	22.58	31.38	30.53	22.99	15.51
	25.43	22.63	23.01	29.55	30.2	23.16	14.24
	25.21	22.79	22.23	29.31	30.11	22.84	14.23
control 10	23.67	23.95	22.55	28.86	28.07	23.66	15.54
	25.61	23.98	22.42	28.19	27.78	23.78	18.1
	25.19	24.47	29.3	27.39	28.05	23.96	15.87
